# Supplementary material for: Warming Ocean Conditions Relate to Increased Trophic Requirements of Threatened and Endangered Salmon
Source: PubMed Central journal article supplement (PMC4682959; doi:10.1371/journal.pone.0144066), 2015-12-16
Supplement: pone.0144066.s004.pdf [file pone.0144066.s004.pdf]

Table S1. Resources for environmental data.

---

Sea Surface Temperature - SST (<http://www.esrl.noaa.gov/psd/data/timeseries>),

Pacific Decadal Oscillation - PDO (<http://jisao.washington.edu/pdo>),

North Pacific Gyre Oscillation - NPGO (<http://www.o3d.org/npgo/npgo.php>),

Coastal Upwelling Index - UPW (<http://www.pfeg.noaa.gov/products/las.html>),

Eastward Eckman Transport – EET (<http://www.pfeg.noaa.gov/products/las.html>)

Columbia River Flow at Bonneville Forebay - COR (<http://www.cbr.washington.edu/dart/river.html>).
